# Supplementary material for: Hidden layers of human small RNAs
Source: PubMed Central journal article supplement (PMC2359750; doi:10.1186/1471-2164-9-157), 2008-04-10

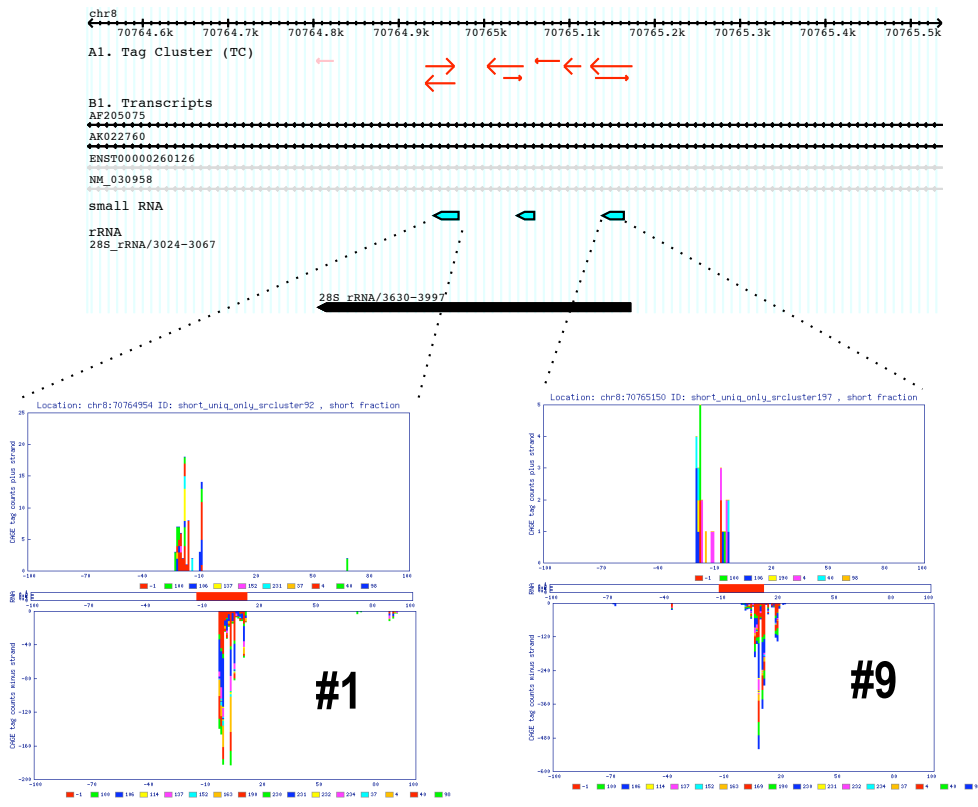

Different colors in the histograms represent CAGE tags deriving from different tissues. Tissue name for each ID are described here:

| ID  | Tissue name           |
|-----|-----------------------|
| -1  | UNDEFINED_TISSUE_TYPE |
| 100 | large intestine       |
| 106 | liver                 |
| 114 | mammary gland         |
| 137 | pancreas              |
| 152 | rectum                |
| 163 | small intestine       |
| 169 | stomach               |
| 190 | urinary bladder       |
| 230 | ureter                |
| 231 | renal artery          |
| 232 | prostate gland        |
| 234 | epididymis            |
| 37  | cecum                 |
| 4   | adipose               |
| 40  | cerebrum              |
| 98  | kidney                |

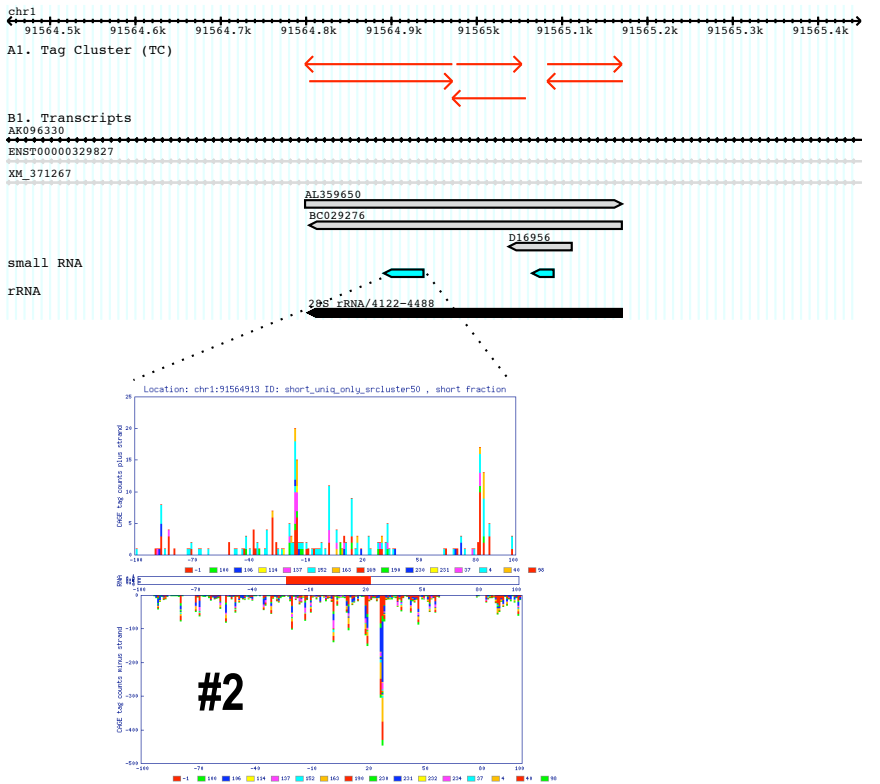

B1. Transcripts

small RNA

rRNA

D17136

28S rRNA/3625-4102

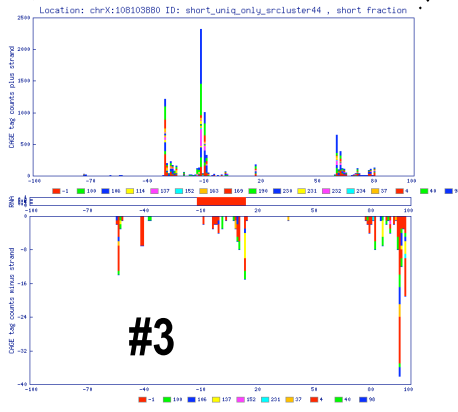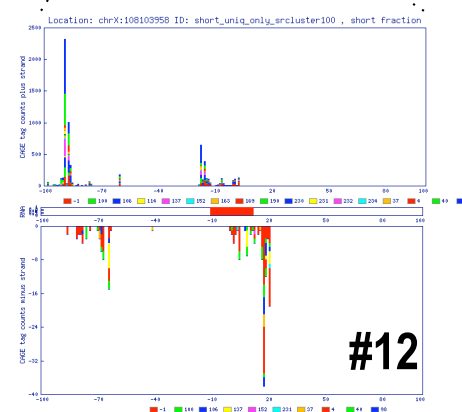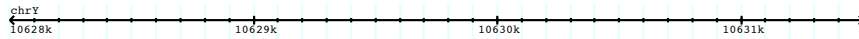

A1. Tag Cluster (TC)

B1. Transcripts

small RNA

rRNA

18S rRNA/0-1869

CR749662

5\_S rRNA/1-152

**#4**

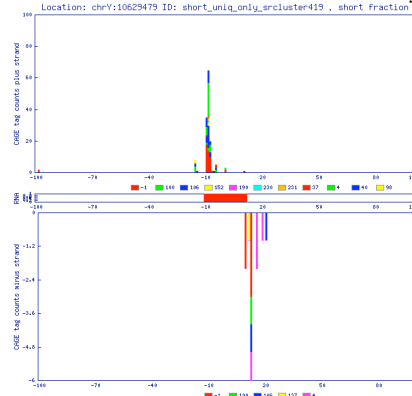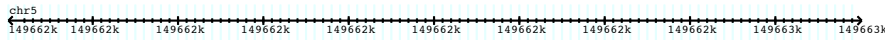

A1. Tag Cluster (TC)

B1. Transcripts

AK122641

ENST00000328668

ENST00000341819

XM\_291139

small RNA

rRNA

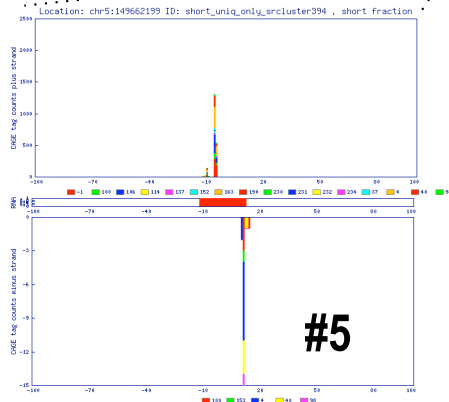

|                          |     |     |     |                                      |
|--------------------------|-----|-----|-----|--------------------------------------|
| zsa22518a10t3.scf        | 223 | 243 | n=1 | CGCCAAGGGCCACCACCGGC                 |
| zsa22501c05t3.scf        | 184 | 205 | n=1 | CGCCGAGGGCGCACCACCGGC                |
| zsa22505g19t3.scf        | 316 | 336 | n=2 | CGCCGAGGGCGCACCACCGGC                |
| zsa22506g19t3.scf        | 328 | 348 | n=1 | CGCCGAGTGCACACCACCGGC                |
| zsa22507i24t3.scf        | 455 | 477 | n=1 | CGCCGAGGGCGCACCACCGGC <sup>TC</sup>  |
| zsa22508a24t3.scf        | 227 | 251 | n=1 | CGCCGAGGGCGCACCACCGGC <sup>CCG</sup> |
| zsa22514a20t3.scf        | 550 | 569 | n=1 | CGCCGAGGGCGCACCA <sup>TCGG</sup>     |
| rDNA(U13369):9368-9391   |     |     |     | CGCCGAGGGCGCACCACCGGC <sup>CCG</sup> |
| chr5:149662187-149662211 |     |     |     | CGCCGAGGGCGCACCACCGGC <sup>CCG</sup> |

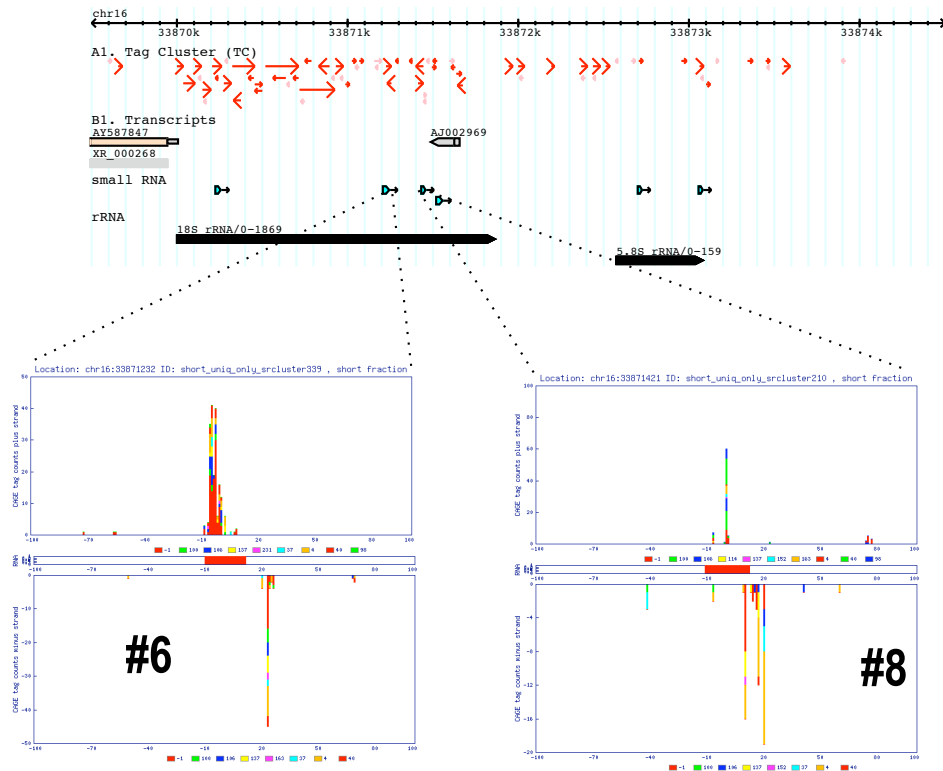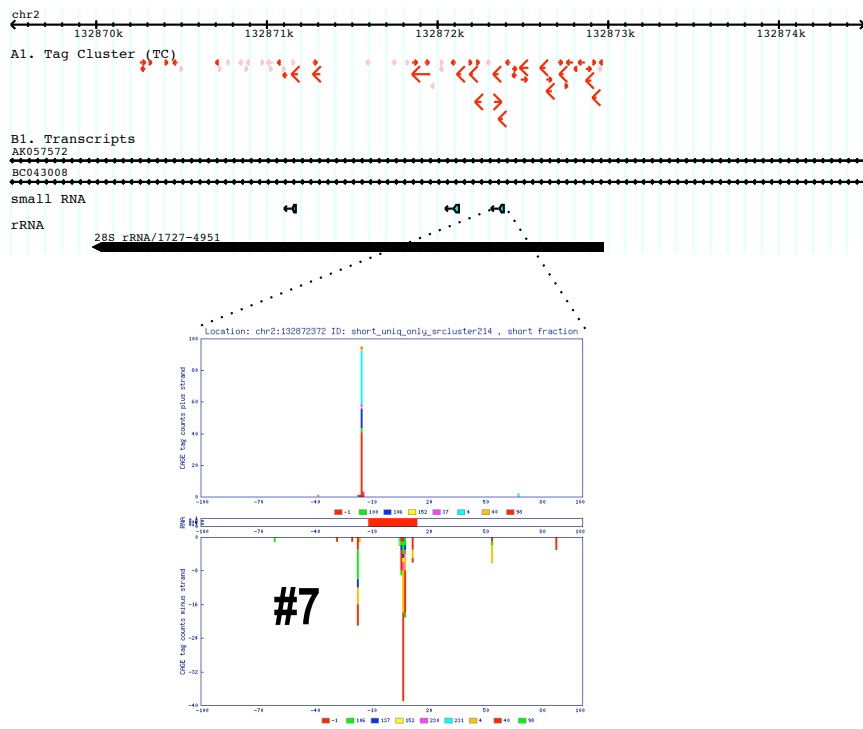

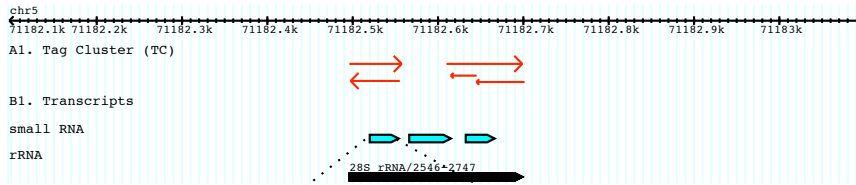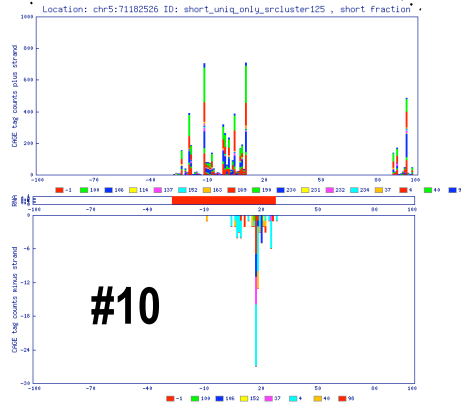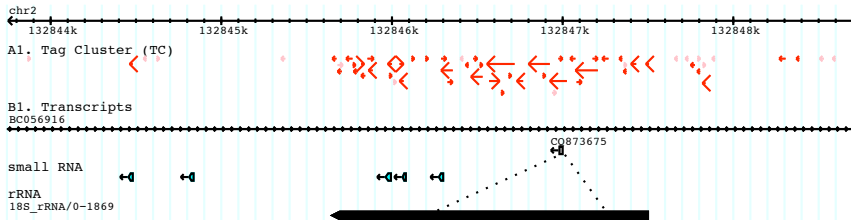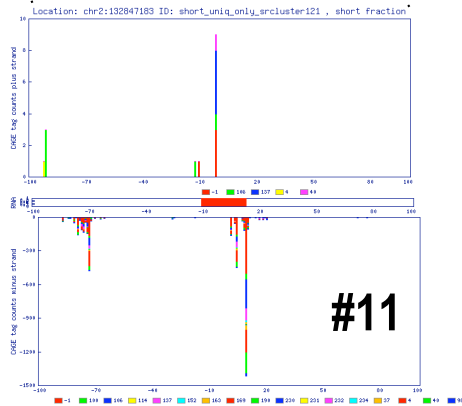

Supplement: 1471-2164-9-157-S10.pdf [file 1471-2164-9-157-S10.pdf]
