# Supplementary material for: Hidden layers of human small RNAs
Source: PubMed Central journal article supplement (PMC2359750; doi:10.1186/1471-2164-9-157), 2008-04-10
Supplement: 1471-2164-9-157-S1.pdf [file 1471-2164-9-157-S1.pdf]

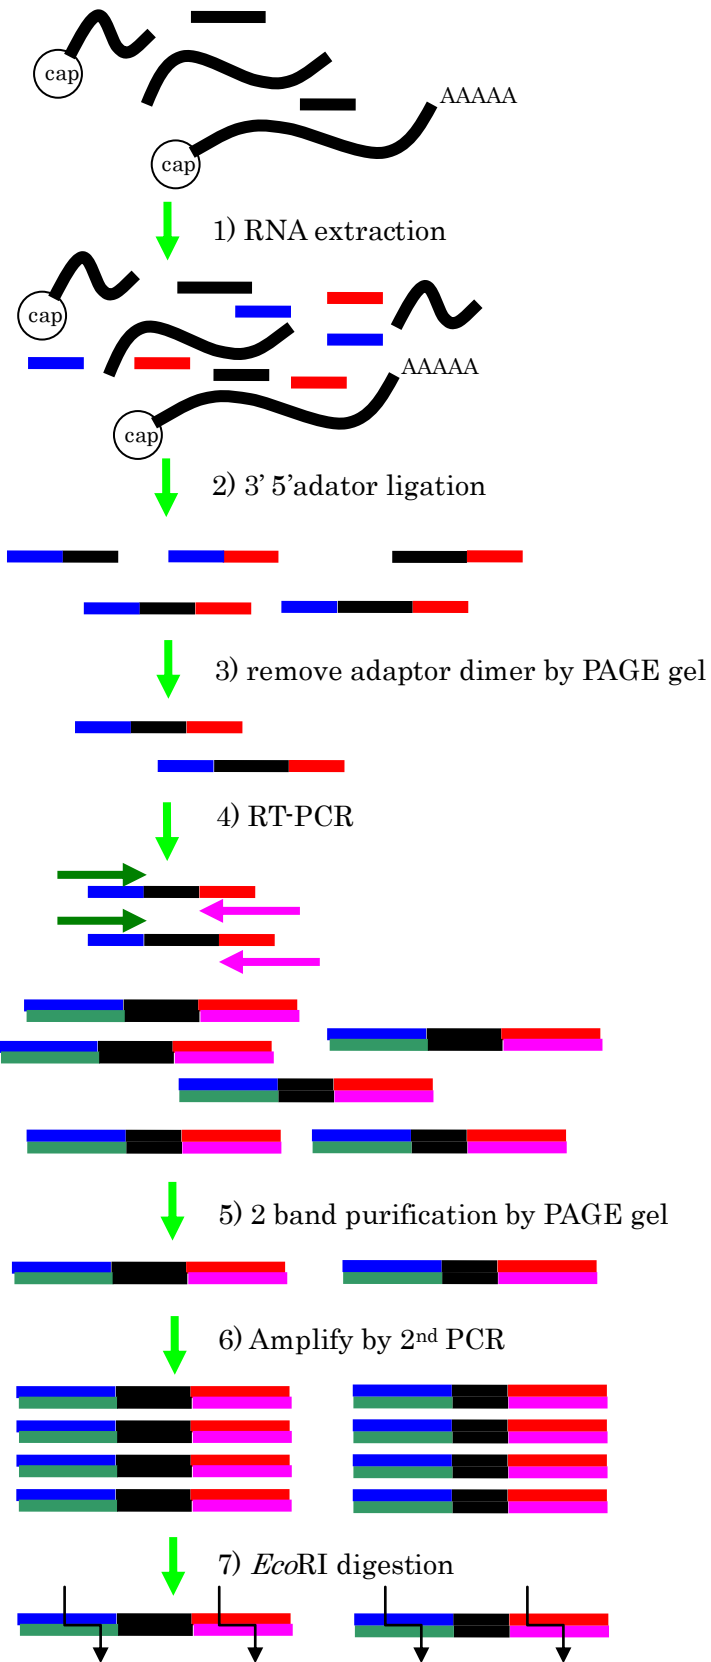

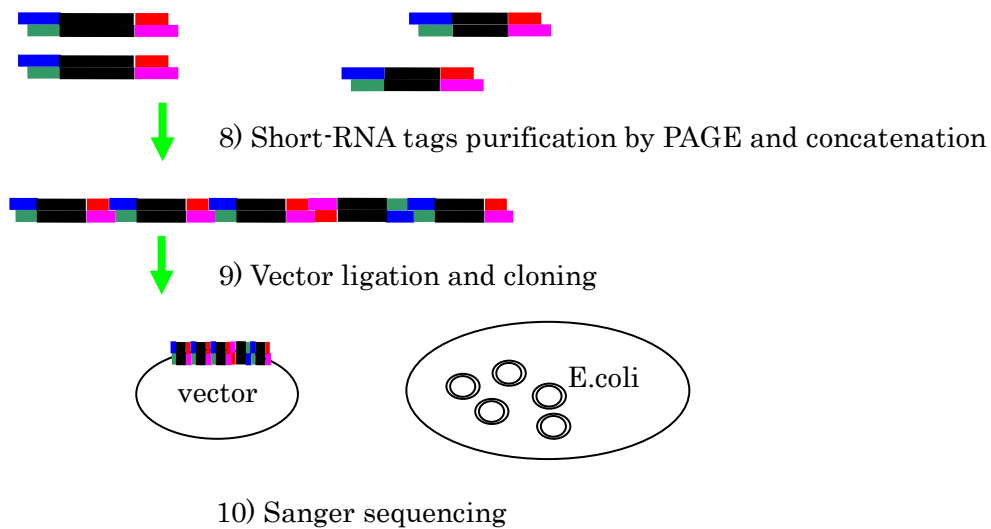

- 1) HepG2 total RNA are extracted by AGPC method minimizing the time in order to avoid random cleavage of RNA.
- 2) 3' and 5' RNA-DNA chimeric oligonucleotides are ligated to the short RNAs.
- 3) Removal of adaptor dimers by PAGE gel electrophoresis
- 4) Reverse transcriptase and 1<sup>st</sup> PCR cycle
- 5) The two main bands are separated by PAGE gel from non-specific products
- 6) 2<sup>nd</sup> PCR to amplify of DNA fragment
- 7) Short RNA tags are cut by using the restriction enzyme EcoRI
- 8) Short RNA tags are purification by PAGE gel and then concatenated
- 9) Concatemers are cloned into the p-ZeroII vector and transformed
- 10) sequence by using RISA system (Sanger based).
