# Supplementary material for: Hidden layers of human small RNAs
Source: PubMed Central journal article supplement (PMC2359750; doi:10.1186/1471-2164-9-157), 2008-04-10
Supplement: 1471-2164-9-157-S3.pdf [file 1471-2164-9-157-S3.pdf]

# of sequences

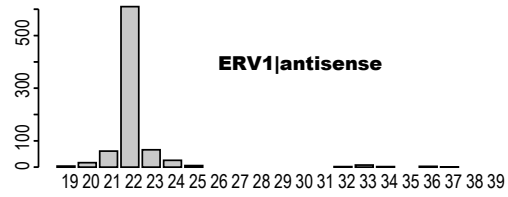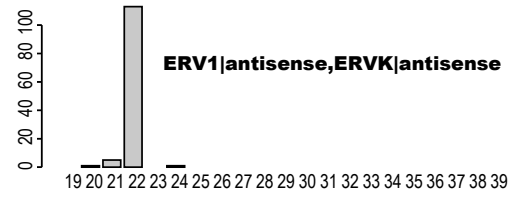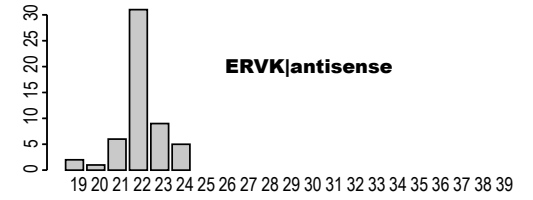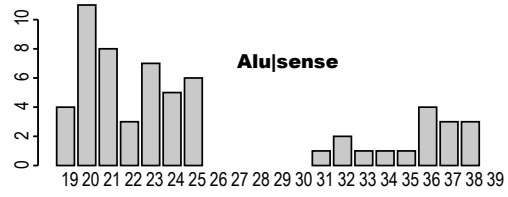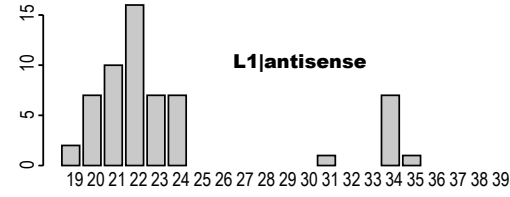

Sequence length
