# Supplementary material for: Hidden layers of human small RNAs
Source: PubMed Central journal article supplement (PMC2359750; doi:10.1186/1471-2164-9-157), 2008-04-10

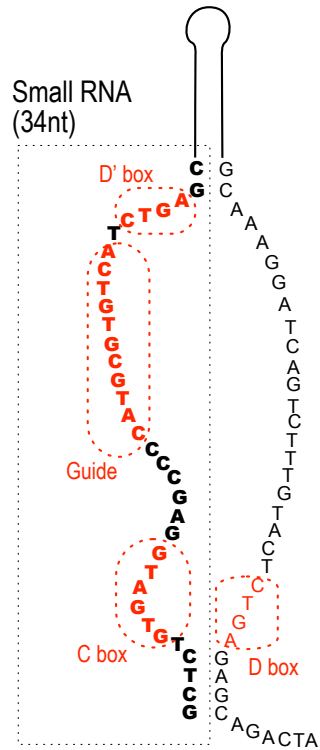

Supplement: 1471-2164-9-157-S5.pdf [file 1471-2164-9-157-S5.pdf]
