# Supplementary material for: Hidden layers of human small RNAs
Source: PubMed Central journal article supplement (PMC2359750; doi:10.1186/1471-2164-9-157), 2008-04-10
Supplement: 1471-2164-9-157-S6.pdf [file 1471-2164-9-157-S6.pdf]

## U1

```
AUACUUACCU GGCAGGGGAG AUACCAUGAU CACGAAGGUG GUUUUCCAG 50
GGCGAGGCUU AUCCAUUGCA CUCCGGAUGU GCUGACCCCU GCGAUUUCC 100
CAA AUGUGGG AAACUCGACU GCAUAAUUUG UGGUAGUGGG GGACUGCGUU 150
                                     ||| ||| ||| ||| |||
                                     TAGTGGG GGACTGCGTT
CGCGCUUUC CCUG
||| ||| ||| ||| |||
CGCGCTCTCC CCTG
```

## U4

```
AGCUUUGCGC AGUGGCAGUA UCGUAGCAA UGAGGUUUU CCGAGGCGCG 50
AUUAUUGCUA AUUGAAAACU UUUCCAAUA CCCC GCCGUG ACGACUUGCA 100
AUUAGUCGG CAUUGGCAAU UUUUGACAGU CUCUACGGAG
                        ||| ||| ||| ||| |||
                        TTTGACAGT CTCTACGGAGACTG
```

## U5

```
ATACTCTGGT TTCTCTCAG ATCGCATAAA TCTTTCGCCT TTTACTAAAG 50
ATTTCCGTGG AGAGGAACAA CTCTGAGTCT TAACCAATT TTTGAGGCC 100
                                     ||| ||| |||
                                     TGAGGCC
TTGCTTTGGC AAGGCTA
||| ||| ||| ||| |||
TTGTTTCGGC AAGGCTA
```
