# Supplementary material for: Hidden layers of human small RNAs
Source: PubMed Central journal article supplement (PMC2359750; doi:10.1186/1471-2164-9-157), 2008-04-10
Supplement: 1471-2164-9-157-S9.pdf [file 1471-2164-9-157-S9.pdf]

| No | genomic coordinates | aligned rRNA |                |
|----|---------------------|--------------|----------------|
| 1  | chr8:70764954       |              |                |
| 9  | chr8:70765150       | 28S_rRNA     |                |
| 2  | chr1:91564913       | 28S_rRNA     |                |
| 3  | chrX:108103880      |              |                |
| 12 | chrX:108103958      | 28S_rRNA     |                |
| 4  | chrY:10629479       | 28S_rRNA     |                |
| 5  | chr5:149662199      | 28S_rRNA     | Just only 24bp |
| 6  | chr16:33871232      |              |                |
| 8  | chr16:33871421      | 5.8S_rRNA    |                |
| 7  | chr2:132872372      | 28S_rRNA     |                |
| 10 | chr5:71182526       | 28S_rRNA     |                |
| 11 | chr2:132847183      | 18S_rRNA     |                |
