# Supplementary material for: Hidden layers of human small RNAs
Source: PubMed Central journal article supplement (PMC2359750; doi:10.1186/1471-2164-9-157), 2008-04-10
Supplement: 1471-2164-9-157-S20.pdf [file 1471-2164-9-157-S20.pdf]

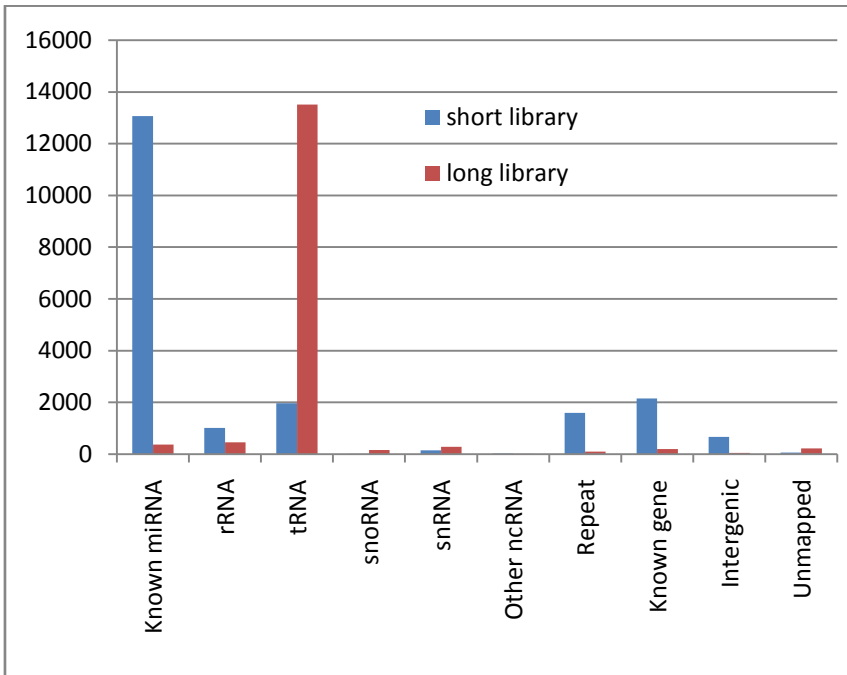

(A) Counts of the all reads

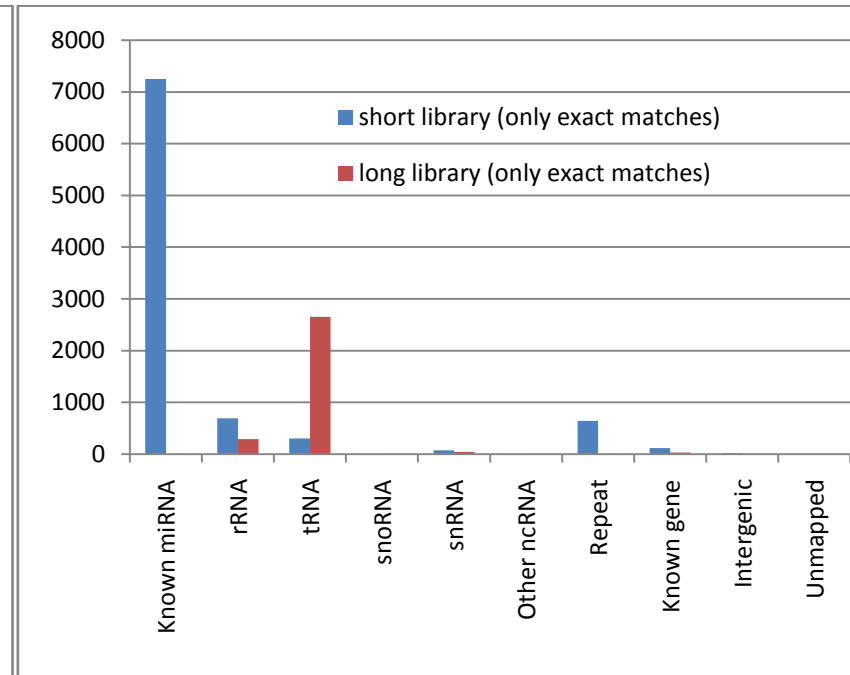

(B) counts of the reads which are perfectly aligned with the genome
