# Supplementary material for: Hidden layers of human small RNAs
Source: PubMed Central journal article supplement (PMC2359750; doi:10.1186/1471-2164-9-157), 2008-04-10
Supplement: 1471-2164-9-157-S21.pdf [file 1471-2164-9-157-S21.pdf]

| <b>tRNA</b> | <b>end</b> | <b>length</b> | <b>sequence</b>                          |
|-------------|------------|---------------|------------------------------------------|
| GluCTC      | 3'         | 22nt          | TCGATTCCCGGTCAGGGAACCA                   |
| AspGTC      | 3'         | 22nt          | TCGATTCCCGACGGGGAGCCA                    |
| HisGTG      | 3'         | 37nt          | CGCAGCAACCTCGGTTTCGTATCCGAGTCACGGCACCA   |
| IleTAT      | 3'         | 35nt          | TGCCGAGGTTGTGAGTTCGGGCCTCACCTGGAGCA      |
| IleTAT      | 5'         | 38nt          | GCTCCAGTGGCGCAATCGGTTAGCGCGCGGTACTIONATA |
| LysCTT      | 5'         | 32nt          | GCCCGGCTAGCTCAGTCGGTAGAGCATGGGAC         |
| AsnGTT      | 3'         | 38nt          | CCGAAAGGTTGGTGGTTCGGGCCACCCAGGGACGCCA    |
