# Supplementary material for: Hidden layers of human small RNAs
Source: BMC Genomics. 2008 Apr 10;9:157. doi: 10.1186/1471-2164-9-157 (PMC2359750; doi:10.1186/1471-2164-9-157)
Supplement: Additional file 4 — Relationship between tRNA and LTR. Schematic structure of tRNA priming of LTR reverse transcription (A), and alignment of LTR's primer binding site (PBS), tRNA 3'-end, and the small RNA matching them (B, C, D) [file 1471-2164-9-157-S4.pdf]

**(A) LTR 5'-end structure**

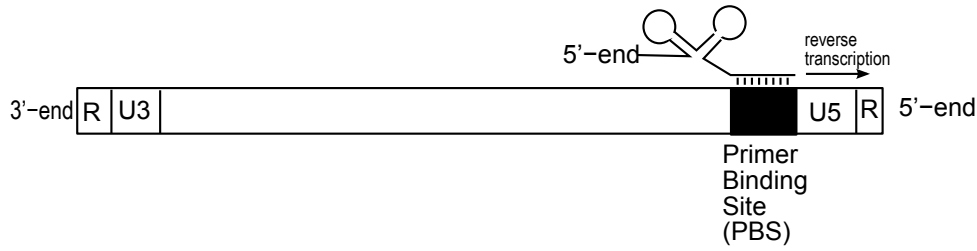

**(B) PBS of Harlequin (ERV1)**

|                               |                                                              |
|-------------------------------|--------------------------------------------------------------|
| 3'-AGCAAAGGGCCAGTCCCTTGGT-5'  | PBS of Harlequin<br>(chr1:168,301,725-168,301,747)           |
|                               |                                                              |
| 5'-TCGTTTCCCGGT CAGGGAACCA-3' | Our small RNA sequence<br>(zza22501a16t3.scf 369 390, n=499) |
|                               |                                                              |
| 5'-TCGATTCCCGGT CAGGGAA-3'    | 3'-end of tRNA<br>(chr1.trna109-GluCTC)                      |
| ▲                             |                                                              |
| 57th                          |                                                              |

**(C) PBS of HERVK9 (ERVK), or MER61A(ERV1)**

|                              |                                            |
|------------------------------|--------------------------------------------|
| 3'-AGCTCGGGGTGCAACCCGCGGT-5' | PBS of                                     |
|                              | HERVK9 (chr5:51,636,598-51,636,619)        |
|                              | or MER61A-int (chr6:76,792,740-76,792,761) |
| 5'-TCGTGCCCCACGTGGGCGCCA-3'  | Our small RNA sequence                     |
|                              | (zza22501g02t3.scf 184 205, n=70)          |
| 5'-TCGAGCCCCACGTGGGCG-3'     | 3'-end of tRNA                             |
| ▲                            | (chr16.trna10-LysCTT)                      |
| 58th                         |                                            |

**(D) PBS of HERVK3 (ERVK) , or LTR3B (ERVK)**

|                               |                                                             |
|-------------------------------|-------------------------------------------------------------|
| 3'-AGTGCAGGGACAAGCCCGCGGT-5'  | PBS of HERVK3, or LTR3B<br>(chr19:62,716,223-62,716,244)    |
|                               |                                                             |
| 5'-TCAGGTCCCTGTTTCGGGCGCCA-3' | Our small RNA sequence<br>(zza22504m18t3.scf 384 405, n=18) |
|                               |                                                             |
| 5'-TCAAGTCCCTGTTTCGGGCG-3'    | 3'-end of tRNA<br>(chr11.trna5-LysTTT)                      |
| ▲                             |                                                             |
| 58th                          |                                                             |
